# Supplementary material for: Hazardous Chemicals Road Transportation Accidents and the Corresponding Evacuation Events from 2012 to 2020 in China: A Review
Source: MDPI journal article supplement (doi:10.3390/ijerph192215182), 2022-11-17
Supplement: s1 [file s1]

The values of an accident trigger probability, event chain probability, and evacuation trigger probability are shown in Table S1, Table S2, and Table S3.

**Table S1.** The proportion of accident frequency of different trigger factors.

| Variable $I_i$ | Description                       | Probability value |
|----------------|-----------------------------------|-------------------|
| $I_1$          | Probability of car body fire      | 0.0196            |
| $I_2$          | Probability of valve failure      | 0.0448            |
| $I_3$          | Probability of tank rupture       | 0.0399            |
| $I_4$          | Probability of brake failure      | 0.0173            |
| $I_5$          | Probability of tire burst         | 0.0429            |
| $I_6$          | Probability of rollover           | 0.3002            |
| $I_7$          | Probability of scraped            | 0.0267            |
| $I_8$          | Probability of impact             | 0.1535            |
| $I_9$          | Probability of rear-end collision | 0.2528            |

**Table S2.** Probability of different event chains caused by different trigger factors in road transportation accidents of hazardous chemicals.

| Variable $H_{ij}$ | Description                                                       | Probability value |
|-------------------|-------------------------------------------------------------------|-------------------|
| $H_{11}$          | Probability of leakage caused by vehicle body fire                | 0.0000            |
| $H_{12}$          | Probability of leakage-explosion caused by vehicle body fire      | 0.0000            |
| $H_{13}$          | Probability of leakage-fire caused by vehicle body fire           | 0.0577            |
| $H_{14}$          | Probability of leakage-fire-explosion caused by vehicle body fire | 0.0000            |
| $H_{15}$          | Probability of fire caused by vehicle body fire                   | 0.5962            |
| $H_{16}$          | Probability of fire-explosion caused by vehicle body fire         | 0.0962            |
| $H_{17}$          | Probability of fire-leakage caused by vehicle body fire           | 0.0769            |
| $H_{18}$          | Probability of explosion caused by vehicle body fire              | 0.0192            |
| $H_{19}$          | Probability of explosion-fire caused by vehicle body fire         | 0.0192            |
| $H_{21}$          | Probability of leakage caused by valve failure                    | 0.9664            |
| $H_{22}$          | Probability of leakage-explosion caused by valve failure          | 0.0000            |
| $H_{23}$          | Probability of leakage-fire caused by valve failure               | 0.0252            |
| $H_{24}$          | Probability of leakage-fire-explosion caused by valve failure     | 0.0000            |
| $H_{25}$          | Probability of fire caused by valve failure                       | 0.0000            |
| $H_{26}$          | Probability of fire-explosion caused by valve failure             | 0.0000            |
| $H_{27}$          | Probability of fire-leakage caused by valve failure               | 0.0000            |
| $H_{28}$          | Probability of explosion caused by valve failure                  | 0.0084            |
| $H_{29}$          | Probability of explosion-fire caused by valve failure             | 0.0000            |
| $H_{31}$          | Probability of leakage caused by tank rupture                     | 0.9528            |
| $H_{32}$          | Probability of leakage-explosion caused by tank rupture           | 0.0094            |
| $H_{33}$          | Probability of leakage-fire caused by tank rupture                | 0.0377            |
| $H_{34}$          | Probability of leakage-fire-explosion caused by tank rupture      | 0.0000            |
| $H_{35}$          | Probability of fire caused by valve failure                       | 0.0000            |
| $H_{36}$          | Probability of fire-explosion caused by tank rupture              | 0.0000            |
| $H_{37}$          | Probability of fire-leakage caused by tank rupture                | 0.0000            |
| $H_{38}$          | Probability of explosion caused by tank rupture                   | 0.0000            |
| $H_{39}$          | Probability of explosion-fire caused by tank rupture              | 0.0000            |
| $H_{41}$          | Probability of leakage caused by brake failure                    | 0.8913            |
| $H_{42}$          | Probability of leakage-explosion caused by brake failure          | 0.0000            |
| $H_{43}$          | Probability of leakage-fire caused by brake failure               | 0.0000            |
| $H_{44}$          | Probability of leakage-fire-explosion caused by brake failure     | 0.0217            |
| $H_{45}$          | Probability of fire caused by brake failure                       | 0.0435            |
| $H_{46}$          | Probability of fire-explosion caused by brake failure             | 0.0435            |
| $H_{47}$          | Probability of fire-leakage caused by brake failure               | 0.0000            |
| $H_{48}$          | Probability of explosion caused by brake failure                  | 0.0000            |
| $H_{49}$          | Probability of explosion-fire caused by brake failure             | 0.0000            |

|          |                                                                    |        |
|----------|--------------------------------------------------------------------|--------|
| $H_{51}$ | Probability of leakage caused by tire burst                        | 0.4336 |
| $H_{52}$ | Probability of leakage-explosion caused by tire burst              | 0.0000 |
| $H_{53}$ | Probability of leakage-fire caused by tire burst                   | 0.0354 |
| $H_{54}$ | Probability of leakage-fire-explosion caused by tire burst         | 0.0354 |
| $H_{55}$ | Probability of fire caused by tire burst                           | 0.3097 |
| $H_{56}$ | Probability of fire-explosion caused by tire burst                 | 0.0354 |
| $H_{57}$ | Probability of fire-leakage caused by tire burst                   | 0.0708 |
| $H_{58}$ | Probability of explosion caused by tire burst                      | 0.0000 |
| $H_{59}$ | Probability of explosion-fire caused by tire burst                 | 0.0000 |
| $H_{61}$ | Probability of leakage caused by rollover                          | 0.9035 |
| $H_{62}$ | Probability of leakage-explosion caused by rollover                | 0.0025 |
| $H_{63}$ | Probability of leakage-fire caused by rollover                     | 0.0401 |
| $H_{64}$ | Probability of leakage-fire-explosion caused by rollover           | 0.0100 |
| $H_{65}$ | Probability of fire caused by rollover                             | 0.0125 |
| $H_{66}$ | Probability of fire-explosion caused by rollover                   | 0.0013 |
| $H_{67}$ | Probability of fire-leakage caused by rollover                     | 0.0000 |
| $H_{68}$ | Probability of explosion caused by rollover                        | 0.0013 |
| $H_{69}$ | Probability of explosion-fire caused by rollover                   | 0.0013 |
| $H_{71}$ | Probability of leakage caused by scraped                           | 0.9155 |
| $H_{72}$ | Probability of leakage-explosion caused by scraped                 | 0.0000 |
| $H_{73}$ | Probability of leakage-fire caused by scraped                      | 0.0282 |
| $H_{74}$ | Probability of leakage-fire-explosion caused by scraped            | 0.0141 |
| $H_{75}$ | Probability of fire caused by scraped                              | 0.0141 |
| $H_{76}$ | Probability of fire-explosion caused by scraped                    | 0.0000 |
| $H_{77}$ | Probability of fire-leakage caused by scraped                      | 0.0000 |
| $H_{78}$ | Probability of explosion caused by scraped                         | 0.0000 |
| $H_{79}$ | Probability of explosion-fire caused by scraped                    | 0.0000 |
| $H_{81}$ | Probability of leakage caused by impact                            | 0.8554 |
| $H_{82}$ | Probability of leakage-explosion caused by impact                  | 0.0000 |
| $H_{83}$ | Probability of leakage-fire caused by impact                       | 0.0515 |
| $H_{84}$ | Probability of leakage-fire-explosion caused by impact             | 0.0147 |
| $H_{85}$ | Probability of fire caused by impact                               | 0.0123 |
| $H_{86}$ | Probability of fire-explosion caused by impact                     | 0.0147 |
| $H_{87}$ | Probability of fire-leakage caused by impact                       | 0.0000 |
| $H_{88}$ | Probability of explosion caused by impact                          | 0.0000 |
| $H_{89}$ | Probability of explosion-fire caused by impact                     | 0.0074 |
| $H_{91}$ | Probability of leakage caused by rear-end collision                | 0.8586 |
| $H_{92}$ | Probability of leakage-explosion caused by rear-end collision      | 0.0015 |
| $H_{93}$ | Probability of leakage-fire caused by rear-end collision           | 0.0521 |
| $H_{94}$ | Probability of leakage-fire-explosion caused by rear-end collision | 0.0193 |
| $H_{95}$ | Probability of fire caused by rear-end collision                   | 0.0238 |
| $H_{96}$ | Probability of fire-explosion caused by rear-end collision         | 0.0104 |
| $H_{97}$ | Probability of fire-leakage caused by rear-end collision           | 0.0015 |
| $H_{98}$ | Probability of explosion caused by rear-end collision              | 0.0030 |
| $H_{99}$ | Probability of explosion-fire caused by rear-end collision         | 0.0045 |

**Table S3.** Different trigger factors in evacuation events lead to different event chain probabilities.

| Variable<br>$E_{ij}$ | Description                                                             | Probability<br>value |
|----------------------|-------------------------------------------------------------------------|----------------------|
| $E_{11}$             | Evacuation probability of leakage caused by vehicle body fire           | 0.0000               |
| $E_{12}$             | Evacuation probability of leakage-explosion caused by vehicle body fire | 0.0000               |
| $E_{13}$             | Evacuation probability of leakage-fire caused by vehicle body fire      | 0.0000               |

|          |                                                                              |        |
|----------|------------------------------------------------------------------------------|--------|
| $E_{14}$ | Evacuation probability of leakage-fire-explosion caused by vehicle body fire | 0.0000 |
| $E_{15}$ | Evacuation probability of fire caused by vehicle body fire                   | 0.0135 |
| $E_{16}$ | Evacuation probability of fire-explosion caused by vehicle body fire         | 0.0000 |
| $E_{17}$ | Evacuation probability of fire-leakage caused by vehicle body fire           | 0.0000 |
| $E_{18}$ | Evacuation probability of explosion caused by vehicle body fire              | 0.0068 |
| $E_{19}$ | Evacuation probability of explosion-fire caused by vehicle body fire         | 0.0000 |
| $E_{21}$ | Evacuation probability of leakage caused by valve failure                    | 0.0338 |
| $E_{22}$ | Evacuation probability of leakage-explosion caused by valve failure          | 0.0000 |
| $E_{23}$ | Evacuation probability of leakage-fire caused by valve failure               | 0.0000 |
| $E_{24}$ | Evacuation probability of leakage-fire-explosion caused by valve failure     | 0.0000 |
| $E_{25}$ | Evacuation probability of fire caused by valve failure                       | 0.0000 |
| $E_{26}$ | Evacuation probability of fire-explosion caused by valve failure             | 0.0000 |
| $E_{27}$ | Evacuation probability of fire-leakage caused by valve failure               | 0.0000 |
| $E_{28}$ | Evacuation probability of explosion caused by valve failure                  | 0.0000 |
| $E_{29}$ | Evacuation probability of explosion-fire caused by valve failure             | 0.0000 |
| $E_{31}$ | Evacuation probability of leakage caused by tank rupture                     | 0.0541 |
| $E_{32}$ | Evacuation probability of leakage-explosion caused by tank rupture           | 0.0000 |
| $E_{33}$ | Evacuation probability of leakage-fire caused by tank rupture                | 0.0000 |
| $E_{34}$ | Evacuation probability of leakage-fire-explosion caused by tank rupture      | 0.0000 |
| $E_{35}$ | Evacuation probability of fire caused by valve failure                       | 0.0000 |
| $E_{36}$ | Evacuation probability of fire-explosion caused by tank rupture              | 0.0000 |
| $E_{37}$ | Evacuation probability of fire-leakage caused by tank rupture                | 0.0000 |
| $E_{38}$ | Evacuation probability of explosion caused by tank rupture                   | 0.0000 |
| $E_{39}$ | Evacuation probability of explosion-fire caused by tank rupture              | 0.0000 |
| $E_{41}$ | Evacuation probability of leakage caused by brake failure                    | 0.0203 |
| $E_{42}$ | Evacuation probability of leakage-explosion caused by brake failure          | 0.0000 |
| $E_{43}$ | Evacuation probability of leakage-fire caused by brake failure               | 0.0000 |
| $E_{44}$ | Evacuation probability of leakage-fire-explosion caused by brake failure     | 0.0000 |
| $E_{45}$ | Evacuation probability of fire caused by brake failure                       | 0.0000 |
| $E_{46}$ | Evacuation probability of fire-explosion caused by brake failure             | 0.0000 |
| $E_{47}$ | Evacuation probability of fire-leakage caused by brake failure               | 0.0000 |
| $E_{48}$ | Evacuation probability of explosion caused by brake failure                  | 0.0000 |
| $E_{49}$ | Evacuation probability of explosion-fire caused by brake failure             | 0.0000 |
| $E_{51}$ | Evacuation probability of leakage caused by tire burst                       | 0.0203 |
| $E_{52}$ | Evacuation probability of leakage-explosion caused by tire burst             | 0.0000 |
| $E_{53}$ | Evacuation probability of leakage-fire caused by tire burst                  | 0.0000 |
| $E_{54}$ | Evacuation probability of leakage-fire-explosion caused by tire burst        | 0.0000 |
| $E_{55}$ | Evacuation probability of fire caused by tire burst                          | 0.0000 |
| $E_{56}$ | Evacuation probability of fire-explosion caused by tire burst                | 0.0000 |
| $E_{57}$ | Evacuation probability of fire-leakage caused by tire burst                  | 0.0068 |
| $E_{58}$ | Evacuation probability of explosion caused by tire burst                     | 0.0000 |
| $E_{59}$ | Evacuation probability of explosion-fire caused by tire burst                | 0.0000 |
| $E_{61}$ | Evacuation probability of leakage caused by rollover                         | 0.3446 |
| $E_{62}$ | Evacuation probability of leakage-explosion caused by rollover               | 0.0000 |
| $E_{63}$ | Evacuation probability of leakage-fire caused by rollover                    | 0.0068 |

|          |                                                                               |        |
|----------|-------------------------------------------------------------------------------|--------|
| $E_{64}$ | Evacuation probability of leakage-fire-explosion caused by rollover           | 0.0068 |
| $E_{65}$ | Evacuation probability of fire caused by rollover                             | 0.0000 |
| $E_{66}$ | Evacuation probability of fire-explosion caused by rollover                   | 0.0000 |
| $E_{67}$ | Evacuation probability of fire-leakage caused by rollover                     | 0.0000 |
| $E_{68}$ | Evacuation probability of explosion caused by rollover                        | 0.0000 |
| $E_{69}$ | Evacuation probability of explosion-fire caused by rollover                   | 0.0000 |
| $E_{71}$ | Evacuation probability of leakage caused by scraped                           | 0.0338 |
| $E_{72}$ | Evacuation probability of leakage-explosion caused by scraped                 | 0.0000 |
| $E_{73}$ | Evacuation probability of leakage-fire caused by scraped                      | 0.0000 |
| $E_{74}$ | Evacuation probability of leakage-fire-explosion caused by scraped            | 0.0000 |
| $E_{75}$ | Evacuation probability of fire caused by scraped                              | 0.0000 |
| $E_{76}$ | Evacuation probability of fire-explosion caused by scraped                    | 0.0000 |
| $E_{77}$ | Evacuation probability of fire-leakage caused by scraped                      | 0.0000 |
| $E_{78}$ | Evacuation probability of explosion caused by scraped                         | 0.0000 |
| $E_{79}$ | Evacuation probability of explosion-fire caused by scraped                    | 0.0000 |
| $E_{81}$ | Evacuation probability of leakage caused by impact                            | 0.1014 |
| $E_{82}$ | Evacuation probability of leakage-explosion caused by impact                  | 0.0000 |
| $E_{83}$ | Evacuation probability of leakage-fire caused by impact                       | 0.0135 |
| $E_{84}$ | Evacuation probability of leakage-fire-explosion caused by impact             | 0.0000 |
| $E_{85}$ | Evacuation probability of fire caused by impact                               | 0.0000 |
| $E_{86}$ | Evacuation probability of fire-explosion caused by impact                     | 0.0000 |
| $E_{87}$ | Evacuation probability of fire-leakage caused by impact                       | 0.0000 |
| $E_{88}$ | Evacuation probability of explosion caused by impact                          | 0.0000 |
| $E_{89}$ | Evacuation probability of explosion-fire caused by impact                     | 0.0068 |
| $E_{91}$ | Evacuation probability of leakage caused by rear-end collision                | 0.1351 |
| $E_{92}$ | Evacuation probability of leakage-explosion caused by rear-end collision      | 0.0000 |
| $E_{93}$ | Evacuation probability of leakage-fire caused by rear-end collision           | 0.0068 |
| $E_{94}$ | Evacuation probability of leakage-fire-explosion caused by rear-end collision | 0.0000 |
| $E_{95}$ | Evacuation probability of fire caused by rear-end collision                   | 0.0068 |
| $E_{96}$ | Evacuation probability of fire-explosion caused by rear-end collision         | 0.0000 |
| $E_{97}$ | Evacuation probability of fire-leakage caused by rear-end collision           | 0.0000 |
| $E_{98}$ | Evacuation probability of explosion caused by rear-end collision              | 0.0000 |
| $E_{99}$ | Evacuation probability of explosion-fire caused by rear-end collision         | 0.0000 |
